# Supplementary figures and images for: FUS/circZEB1/miR-128-3p/LBH feedback loop contributes to the malignant phenotype of GSCs via TNF-α-mediated NF-κB signaling pathway
Source: PubMed Central journal article supplement — Cancer Cell Int. 2024 Nov 7;24:365. doi: 10.1186/s12935-024-03526-8 (PMC11545228; doi:10.1186/s12935-024-03526-8), 2024-11-07

**a**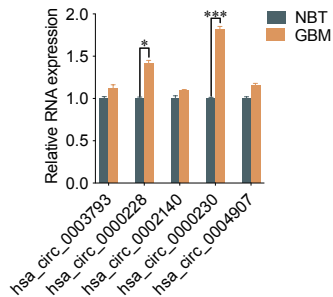**b**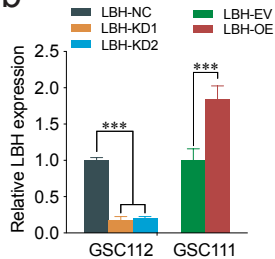**c**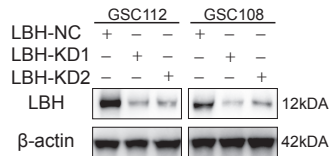**d**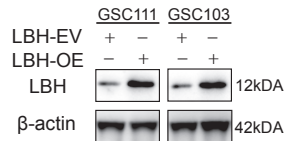**e**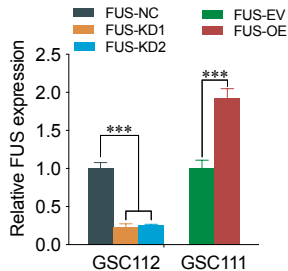**f**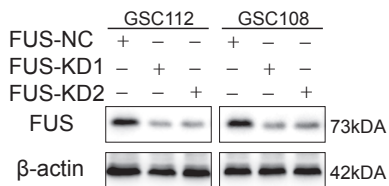**g**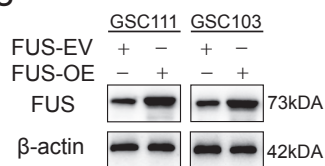

Supplement: 12935_2024_3526_MOESM1_ESM.pdf [file 12935_2024_3526_MOESM1_ESM.pdf]

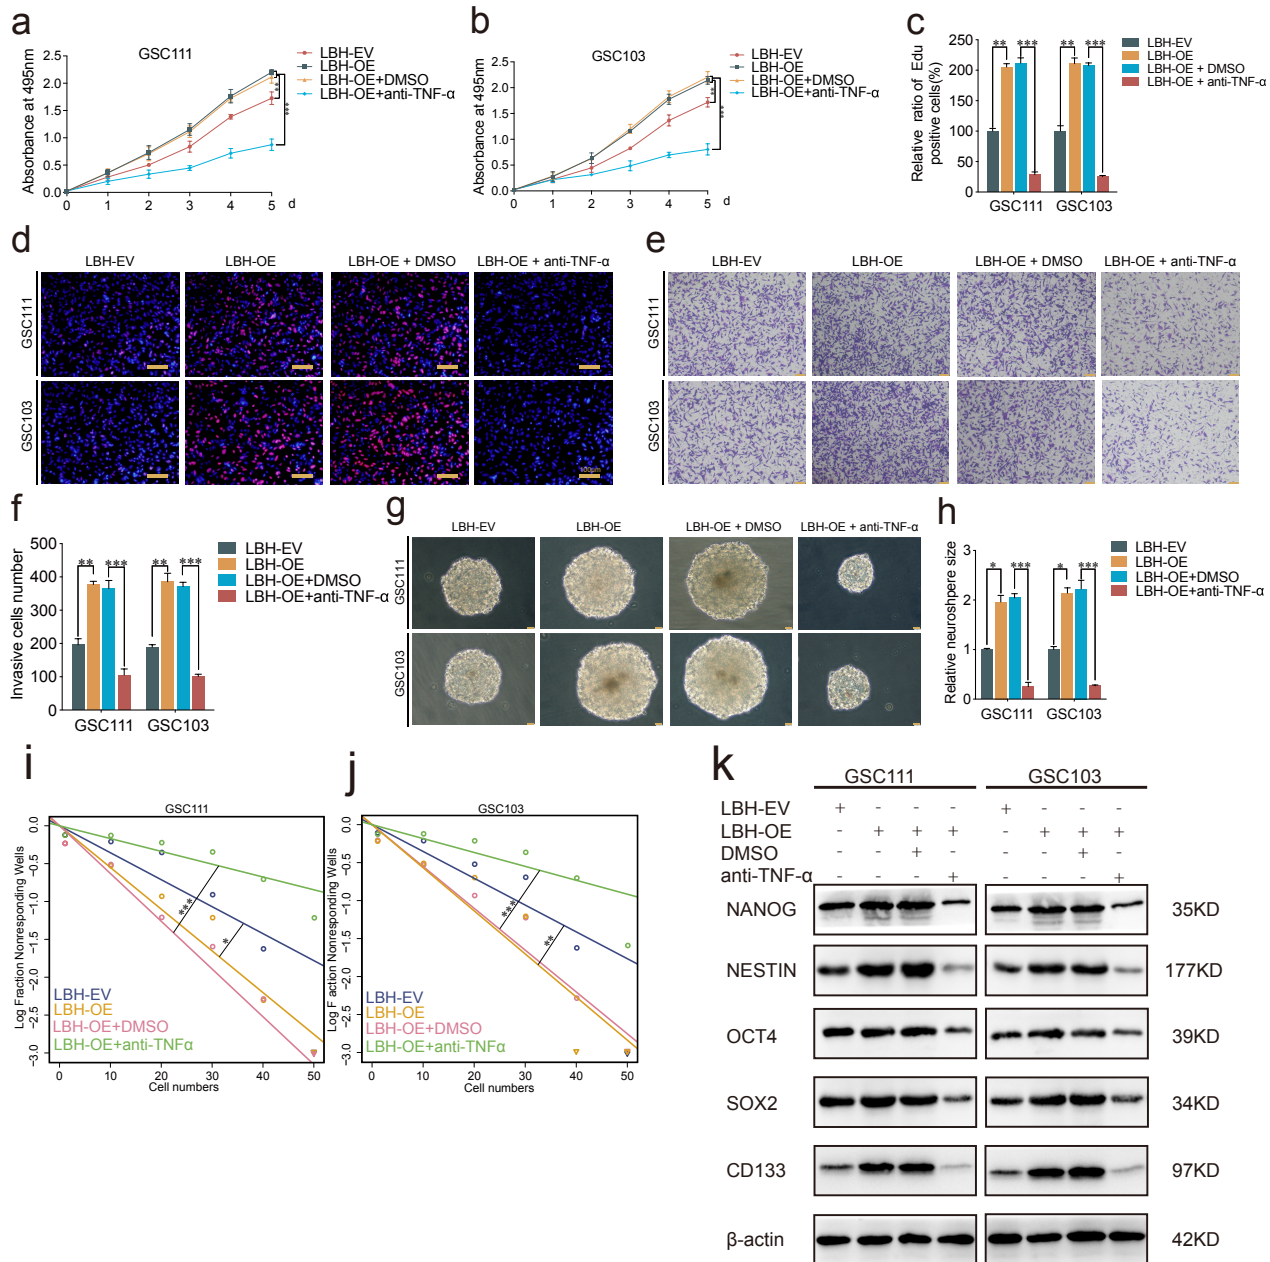

Supplement: 12935_2024_3526_MOESM2_ESM.pdf [file 12935_2024_3526_MOESM2_ESM.pdf]

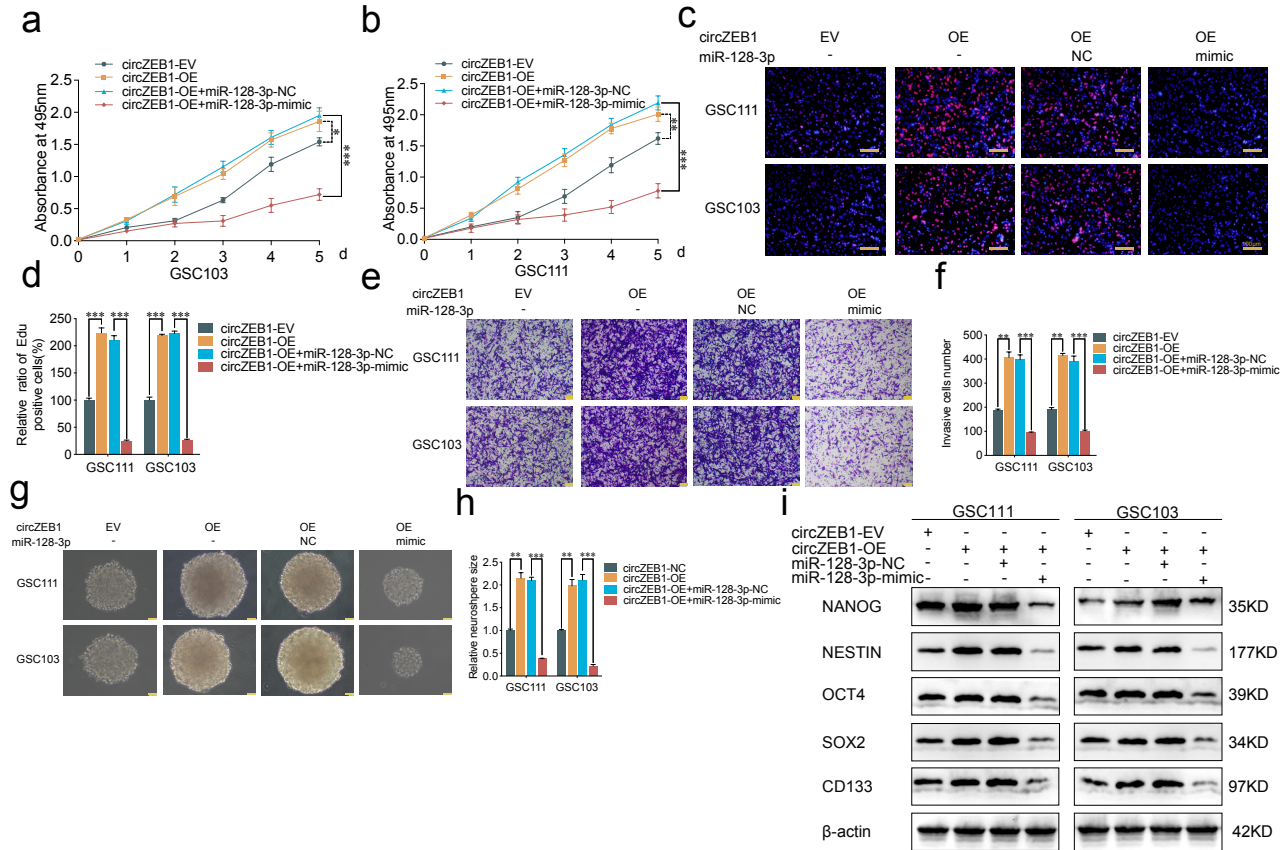

Supplement: 12935_2024_3526_MOESM3_ESM.pdf [file 12935_2024_3526_MOESM3_ESM.pdf]

**a**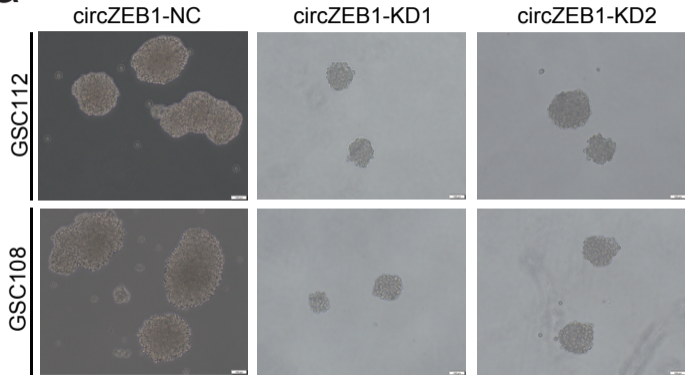**b**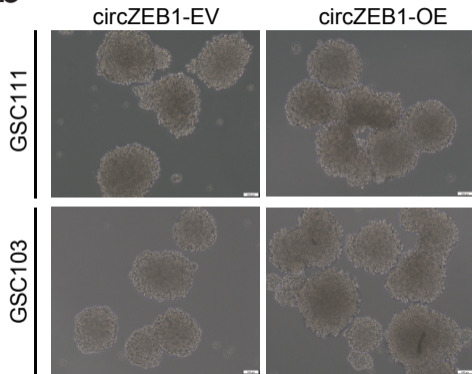

Supplement: 12935_2024_3526_MOESM4_ESM.pdf [file 12935_2024_3526_MOESM4_ESM.pdf]
